# Supplementary material for: Diagnostic accuracy of clinical tests for cam or pincer morphology in individuals with suspected FAI syndrome: a systematic review
Source: PubMed Central journal article supplement (PMC7213881; doi:10.1136/bmjsem-2020-000772), 2020-04-27
Supplement: bmjsem-2020-000772supp001.pdf [file bmjsem-2020-000772supp001.pdf]

Table 1 Characteristics of included studies

| Author                  | Year        | Country | Study design                          | Study aim                                                                                                                | Setting                                                              | Types of participants                                                                                                                           | Sample size              | Age (y)   | Sex                  | Clinical tests                                                                               | Criteria for positive testing                                                                                        | Reference test                                    | Criteria for positive reference standard                                                                                        |
|-------------------------|-------------|---------|---------------------------------------|--------------------------------------------------------------------------------------------------------------------------|----------------------------------------------------------------------|-------------------------------------------------------------------------------------------------------------------------------------------------|--------------------------|-----------|----------------------|----------------------------------------------------------------------------------------------|----------------------------------------------------------------------------------------------------------------------|---------------------------------------------------|---------------------------------------------------------------------------------------------------------------------------------|
| <b>Ayeni et al.</b>     | <b>2014</b> | Canada  | prospective cohort study              | to determine the sensitivity and specificity of a maximal Squat test for a cam deformity                                 | adult outpatient orthopaedic clinic                                  | adults with hip pain, an MRI/MRA of the affected hip and ability to perform an unassisted maximal squat                                         | 78 hips                  | mean 38.3 | 37 males, 39 females | maximal Squat                                                                                | recreation of typical hip and groin pain while squatting                                                             | MRI / MRA: axial oblique sequences                | cam: alpha angle > 55° and/or femoral head-neck offset < 9 mm                                                                   |
| <b>Clohisy et al.</b>   | <b>2009</b> | USA     | prospective cohort study              | to describe clinical history, function and physical examination findings associated with symptomatic FAI                 | not stated                                                           | patients with confirmed symptomatic FAI (by X-ray), scheduled for surgery                                                                       | 51 patients <sup>1</sup> | mean 35   | 29 males, 22 females | FABER<br>log roll<br>Stinchfield (=RSLR)<br>FADIR (=AIT)<br>posterior impingement test (PIT) | groin pain                                                                                                           | X-ray: a/p, frog leg lateral, cross-table lateral | cam: aspherical femoral head, femoral head-neck offset < 9 mm<br>pincer: acetabular retroversion, coxa profunda, coxa protrusio |
| <b>Maslowski et al.</b> | <b>2010</b> | USA     | prospective diagnostic validity study | to validate the diagnostic utility of hip provocation maneuvers to predict the presence of intra-articular hip pathology | multispecialty musculoskeletal clinic at a university medical center | subjects ≥ 18y, referred for injection with typical symptoms, physical examination findings and radiography suggesting intra-articular hip pain | 50 patients              | mean 60   | 20 males, 30 females | FABER<br>Stinchfield (=RSLR)<br>Scour<br>IROP                                                | recreation of typical hip pain<br>recreation of typical hip pain<br>recreation of hip pain<br>recreation of hip pain | X-ray, MRI, MRA                                   | not stated                                                                                                                      |

| Author                  | Year | Country         | Study design                   | Study aim                                                                                                   | Setting                              | Types of participants                                                                  | Sample size  | Age (y) | Sex                                      | Clinical tests                    | Criteria for positive testing                                                                                                     | Reference test                                                                     | Criteria for positive reference standard                                                                                                               |
|-------------------------|------|-----------------|--------------------------------|-------------------------------------------------------------------------------------------------------------|--------------------------------------|----------------------------------------------------------------------------------------|--------------|---------|------------------------------------------|-----------------------------------|-----------------------------------------------------------------------------------------------------------------------------------|------------------------------------------------------------------------------------|--------------------------------------------------------------------------------------------------------------------------------------------------------|
| <b>Nogier et al.</b>    | 2010 | France          | prospective multicenter study  | to assess the prevalence of dysplasia and femoroacetabular impingement                                      | four surgical centers                | mechanical hip pathology, pain more than 4 months                                      | 241 patients | 16-50   | 292 participants, 62% males, 38% females | flexion plus internal rotation    | pain, predominantly during flexion/internal rotation                                                                              | X-ray: a/p, Lequesne false profile, lateral axial (Ducroquet or Dunn lateral view) | cam: femoral head bump, anterosuperior neck flatness or ovoid head (on AP or lateral axial view) pincer: crossover sign or acetabular protrusion       |
| <b>Philippon et al.</b> | 2007 | USA             | prospective cohort study       | to identify subjective complaints and objective findings in patients treated for FAI                        | patients treated by a senior surgeon | patients treated for FAI: osteoplasty of femoral neck and / or acetabular rim trimming | 301 patients | mean 40 | 153 males, 148 females                   | FADIR (=AIT) FDT                  | hip pain<br>any loss of distance between the lateral aspect of the knee and the examination table, compared to the unaffected hip | X-ray: a/p, cross-table lateral view                                               | cam: decreased offset of superior or anterior femoral head-neck junction pincer: coxa profunda, acetabular protrusion or retroversion, cross-over sign |
| <b>Ranawat et al.</b>   | 2017 | USA<br>New York | prospective study              | to evaluate the Foot Progression Angle Walking (FPAW) test as a diagnostic tool for FAI and hip instability | hospital                             | subjects with hip pain                                                                 | 199 patients | 18-65   | 85 males, 114 females                    | FPAW<br><br>FADIR (=AIT)<br>FABER | presence of hip pain during testing or exacerbation of symptoms if pain was present at baseline not stated                        | X-ray: a/p, elongated neck lateral view                                            | cam or mixed form: alpha angle $\geq 60^\circ$ , pincer: center-edge angle $> 30^\circ$                                                                |
| <b>Ratzlaff et al.</b>  | 2015 | Canada          | prospective cohort study, only | to estimate the prevalence and diagnostic                                                                   | university                           | Caucasian people with FAI and pain                                                     | 143 hips     | 20-49   | 510 Caucasian participants,              | Internal rotation pain            | not stated                                                                                                                        | X-ray: a/p,                                                                        | FAI: any one of 1) lateral center edge                                                                                                                 |

| Author                 | Year        | Country | Study design             | Study aim                                                                                                      | Setting    | Types of participants                                                                                                                                                                                                                       | Sample size  | Age (y)          | Sex                      | Clinical tests                                                                                                                                             | Criteria for positive testing                                                                                                        | Reference test     | Criteria for positive reference standard                                     |
|------------------------|-------------|---------|--------------------------|----------------------------------------------------------------------------------------------------------------|------------|---------------------------------------------------------------------------------------------------------------------------------------------------------------------------------------------------------------------------------------------|--------------|------------------|--------------------------|------------------------------------------------------------------------------------------------------------------------------------------------------------|--------------------------------------------------------------------------------------------------------------------------------------|--------------------|------------------------------------------------------------------------------|
|                        |             |         | abstract, no full text   | accuracy of physical exam tests in identifying radiographic FAI                                                |            |                                                                                                                                                                                                                                             |              |                  | 35.7% male, 64.3% female | post impingement (PIT)<br>f120 add IR<br>f90 add IR (FADIR)<br>f90 add C<br>f120 add C<br>IR ROM <20<br>FLEX ROM <115<br>IR ROM & FABER<br>IR ROM & f90 IR |                                                                                                                                      | bilateral Dunn     | angle (LCE) > 40°, 2) alpha angle > 55° and 3) presence of a cross-over sign |
| <b>Trindade et al.</b> | <b>2018</b> | USA     | prospective cohort study | to determine if the FABER distance test (FDT) was associated with the alpha angle as a diagnostic tool for FAI | not stated | patients with symptomatic unilateral FAI who underwent hip arthroscopy. Patients were included if they had hip pain, alpha angle $\geq 50^\circ$ , $\geq 18$ years, prospectively documented FDT and alpha angle and complete physical exam | 603 patients | 18-71, 36.4 mean | 344 males, 259 female    | FDT                                                                                                                                                        | distance from the lateral femoral epicondyle of the knee to the examination table, with a difference between sides greater than 4 cm | X-ray: Cross-table | alpha angle $\geq 78^\circ$                                                  |

<sup>1</sup> varying number of hips tested for each clinical test

| Author                                                                                                                                                                                                                                                                                                                                                                                                                                                                                                                                             | Year | Country | Study design | Study aim | Setting | Types of participants | Sample size | Age (y) | Sex | Clinical tests | Criteria for positive testing | Reference test | Criteria for positive reference standard |
|----------------------------------------------------------------------------------------------------------------------------------------------------------------------------------------------------------------------------------------------------------------------------------------------------------------------------------------------------------------------------------------------------------------------------------------------------------------------------------------------------------------------------------------------------|------|---------|--------------|-----------|---------|-----------------------|-------------|---------|-----|----------------|-------------------------------|----------------|------------------------------------------|
| AIT: Anterior Impingement Test, add: Adduction, C: Compression, f90: Flexion 90°, f120: Flexion 120°, FABER: Flexion Abduction External Rotation, FADIR: Flexion Adduction Internal Rotation, FAI: Femoroacetabular Impingement, FDT: FABER Distance Test, FPAW: Foot Progression Angle Walking, IROP: Internal Rotation Over Pressure, IR: Internal Rotation, MRI: Magnetic Resonance Imaging, MRA: Magnetic Resonance Arthrography, PIT: Posterior Impingement Test, ROM: Range Of Motion, RSLR: Resisted Straight Leg Raise, X-ray: Radiography |      |         |              |           |         |                       |             |         |     |                |                               |                |                                          |
