# Supplementary material for: Diagnostic accuracy of clinical tests for cam or pincer morphology in individuals with suspected FAI syndrome: a systematic review
Source: PubMed Central journal article supplement (PMC7213881; doi:10.1136/bmjsem-2020-000772), 2020-04-27
Supplement: bmjsem-2020-000772supp002.pdf [file bmjsem-2020-000772supp002.pdf]

Table 3S diagnostic accuracy of different imaging index tests used in included studies

| Imaging Index Test |        | Reference Test       | Sensitivity | Specificity | Reference         |
|--------------------|--------|----------------------|-------------|-------------|-------------------|
| MRA                | versus | Arthroscopy          | 0.79        | 1           | González 2015 (1) |
| MRA                | versus | Arthroscopy          | 0.34        | 0.82        | Rajeev 2018 (2)   |
| MRA                | versus | Arthroscopy          | 1           | 1           | Aprato 2013 (3)   |
| MRA                | versus | Surgical dislocation | 1           | 1           | Aprato 2013 (3)   |
| x-Ray AP           | versus | MRI                  | 0.6         | 0.81        | Barton 2011 (4)   |
| x-Ray cross table  | versus | MRI                  | 0.74        | 0.63        | Barton 2011(4)    |
| x-Ray Dunn         | versus | MRI                  | 0.91        | 0.88        | Barton 2011 (4)   |

1 González Gil AB, Llombart Blanco R, Díaz de Rada P. Validity of magnetic resonance arthrography as a diagnostic tool in femoroacetabular impingement syndrome. *Revista Española de Cirugía Ortopédica y Traumatología (English Edition)* 2015;4:281-6 doi:10.1016/j.recote.2015.04.009.

2 Rajeev A, Tuinebreijer W, Mohamed A, Newby M. The validity and accuracy of MRI arthrogram in the assessment of painful articular disorders of the hip. *Eur J Orthop Surg Traumatol* 2018;1:71-7 doi:10.1007/s00590-017-2022-9.

3 Aprato A, Masse A, Faletti C, Valente A, Atzori F, Stratta M, et al. Magnetic resonance arthrography for femoroacetabular impingement surgery: is it reliable? *J Orthop Traumatol* 2013;3:201-6 doi:10.1007/s10195-013-0227-1.

4 Barton C, Salineros MJ, Rakhra KS, Beule PE. Validity of the alpha angle measurement on plain radiographs in the evaluation of cam-type femoroacetabular impingement. *Clin Orthop Relat Res* 2011;2:464-9 doi:10.1007/s11999-010-1624-x.
