# Supplementary material for: Diagnostic accuracy of clinical tests for cam or pincer morphology in individuals with suspected FAI syndrome: a systematic review
Source: PubMed Central journal article supplement (PMC7213881; doi:10.1136/bmjsem-2020-000772), 2020-04-27
Supplement: bmjsem-2020-000772supp003.pdf [file bmjsem-2020-000772supp003.pdf]

Table 4S reliability of plain radiography for measuring alpha angles (1)

|                           | Intraobserver reliability (with CIs) | Interobserver reliability (with CIs) |
|---------------------------|--------------------------------------|--------------------------------------|
| AP view on X-ray          | 0.884<br>(0.746–0.949)               | 0.947<br>(0.909–0.969)               |
| Cross table view on X-ray | 0.947<br>(0.88–0.977)                | 0.85<br>(0.751–0.911)                |
| Dunn view on X-ray        | 0.979<br>(0.952–0.991)               | 0.90<br>(0.832–0.942)                |

1 Barton C, Salineros MJ, Rakhra KS, Beaulé PE. Validity of the alpha angle measurement on plain radiographs in the evaluation of cam-type femoroacetabular impingement. *Clin Orthop Relat Res* 2011;2:464-9 doi:10.1007/s11999-010-1624-x.
