# Supplementary material for: Diagnostic accuracy of clinical tests for cam or pincer morphology in individuals with suspected FAI syndrome: a systematic review
Source: PubMed Central journal article supplement (PMC7213881; doi:10.1136/bmjsem-2020-000772), 2020-04-27
Supplement: bmjsem-2020-000772supp004.pdf [file bmjsem-2020-000772supp004.pdf]

## FABER (Patrick)

| Study          | TP | FP | FN | TN | Sensitivity (95% CI) | Specificity (95% CI) | Sensitivity (95% CI) | Specificity (95% CI) |
|----------------|----|----|----|----|----------------------|----------------------|----------------------|----------------------|
| Clohisy 2009   | 52 | 0  | 1  | 0  | 0.98 [0.90, 1.00]    | Not estimable        |                      |                      |
| Maslowski 2010 | 3  | 36 | 2  | 9  | 0.60 [0.15, 0.95]    | 0.20 [0.10, 0.35]    |                      |                      |
| Ratzlaff 2015  | 53 | 0  | 90 | 0  | 0.37 [0.29, 0.46]    | Not estimable        |                      |                      |

## FDT

| Study          | TP  | FP  | FN | TN  | Sensitivity (95% CI) | Specificity (95% CI) | Sensitivity (95% CI) | Specificity (95% CI) |
|----------------|-----|-----|----|-----|----------------------|----------------------|----------------------|----------------------|
| Philippon 2007 | 292 | 0   | 9  | 0   | 0.97 [0.94, 0.99]    | Not estimable        |                      |                      |
| Trindade 2018  | 145 | 270 | 26 | 162 | 0.85 [0.79, 0.90]    | 0.38 [0.33, 0.42]    |                      |                      |

## Stinchfield (RSLR)

| Study          | TP | FP | FN | TN | Sensitivity (95% CI) | Specificity (95% CI) | Sensitivity (95% CI) | Specificity (95% CI) |
|----------------|----|----|----|----|----------------------|----------------------|----------------------|----------------------|
| Clohisy 2009   | 23 | 0  | 18 | 0  | 0.56 [0.40, 0.72]    | Not estimable        |                      |                      |
| Maslowski 2010 | 3  | 29 | 2  | 16 | 0.60 [0.15, 0.95]    | 0.36 [0.22, 0.51]    |                      |                      |

## Scour maneuver

| Study          | TP | FP | FN | TN | Sensitivity (95% CI) | Specificity (95% CI) | Sensitivity (95% CI) | Specificity (95% CI) |
|----------------|----|----|----|----|----------------------|----------------------|----------------------|----------------------|
| Maslowski 2010 | 4  | 27 | 1  | 18 | 0.80 [0.28, 0.99]    | 0.40 [0.26, 0.56]    |                      |                      |

## IROP

| Study          | TP | FP | FN | TN | Sensitivity (95% CI) | Specificity (95% CI) | Sensitivity (95% CI) | Specificity (95% CI) |
|----------------|----|----|----|----|----------------------|----------------------|----------------------|----------------------|
| Maslowski 2010 | 5  | 38 | 0  | 7  | 1.00 [0.48, 1.00]    | 0.16 [0.06, 0.29]    |                      |                      |

## Internal Rotation Pain

| Study         | TP | FP | FN | TN | Sensitivity (95% CI) | Specificity (95% CI) | Sensitivity (95% CI) | Specificity (95% CI) |
|---------------|----|----|----|----|----------------------|----------------------|----------------------|----------------------|
| Ratzlaff 2015 | 56 | 0  | 87 | 0  | 0.39 [0.31, 0.48]    | Not estimable        |                      |                      |

## Posterior Impingement

| Study         | TP | FP | FN  | TN | Sensitivity (95% CI) | Specificity (95% CI) | Sensitivity (95% CI) | Specificity (95% CI) |
|---------------|----|----|-----|----|----------------------|----------------------|----------------------|----------------------|
| Clohisy 2009  | 10 | 0  | 37  | 0  | 0.21 [0.11, 0.36]    | Not estimable        |                      |                      |
| Ratzlaff 2015 | 26 | 0  | 117 | 0  | 0.18 [0.12, 0.25]    | Not estimable        |                      |                      |

## f120 add IR

| Study         | TP  | FP | FN | TN | Sensitivity (95% CI) | Specificity (95% CI) | Sensitivity (95% CI) | Specificity (95% CI) |
|---------------|-----|----|----|----|----------------------|----------------------|----------------------|----------------------|
| Ratzlaff 2015 | 106 | 0  | 37 | 0  | 0.74 [0.66, 0.81]    | Not estimable        |                      |                      |

## FADIR (AIT, f90 add IR)

| Study          | TP  | FP | FN | TN | Sensitivity (95% CI) | Specificity (95% CI) | Sensitivity (95% CI) | Specificity (95% CI) |
|----------------|-----|----|----|----|----------------------|----------------------|----------------------|----------------------|
| Clohisy 2009   | 47  | 0  | 6  | 0  | 0.89 [0.77, 0.98]    | Not estimable        |                      |                      |
| Philippon 2007 | 298 | 0  | 3  | 0  | 0.99 [0.97, 1.00]    | Not estimable        |                      |                      |
| Ranawat 2017   | 107 | 78 | 4  | 10 | 0.96 [0.91, 0.99]    | 0.11 [0.06, 0.20]    |                      |                      |
| Ratzlaff 2015  | 79  | 0  | 64 | 0  | 0.55 [0.47, 0.64]    | Not estimable        |                      |                      |

## f90 add C

| Study         | TP | FP | FN | TN | Sensitivity (95% CI) | Specificity (95% CI) | Sensitivity (95% CI) | Specificity (95% CI) |
|---------------|----|----|----|----|----------------------|----------------------|----------------------|----------------------|
| Ratzlaff 2015 | 47 | 0  | 96 | 0  | 0.33 [0.25, 0.41]    | Not estimable        |                      |                      |

## f120 add C

| Study         | TP | FP | FN | TN | Sensitivity (95% CI) | Specificity (95% CI) | Sensitivity (95% CI) | Specificity (95% CI) |
|---------------|----|----|----|----|----------------------|----------------------|----------------------|----------------------|
| Ratzlaff 2015 | 86 | 0  | 57 | 0  | 0.60 [0.52, 0.68]    | Not estimable        |                      |                      |

## IR ROM &lt; 20

| Study         | TP | FP | FN  | TN | Sensitivity (95% CI) | Specificity (95% CI) | Sensitivity (95% CI) | Specificity (95% CI) |
|---------------|----|----|-----|----|----------------------|----------------------|----------------------|----------------------|
| Ratzlaff 2015 | 31 | 0  | 112 | 0  | 0.22 [0.15, 0.29]    | Not estimable        |                      |                      |

## FLEX ROM &lt; 115

| Study         | TP | FP | FN  | TN | Sensitivity (95% CI) | Specificity (95% CI) | Sensitivity (95% CI) | Specificity (95% CI) |
|---------------|----|----|-----|----|----------------------|----------------------|----------------------|----------------------|
| Ratzlaff 2015 | 29 | 0  | 114 | 0  | 0.20 [0.14, 0.28]    | Not estimable        |                      |                      |

## IR ROM &amp; FABER

| Study         | TP | FP | FN  | TN | Sensitivity (95% CI) | Specificity (95% CI) | Sensitivity (95% CI) | Specificity (95% CI) |
|---------------|----|----|-----|----|----------------------|----------------------|----------------------|----------------------|
| Ratzlaff 2015 | 19 | 0  | 124 | 0  | 0.13 [0.08, 0.20]    | Not estimable        |                      |                      |

## IR ROM &amp; f90 IR

| Study         | TP | FP | FN  | TN | Sensitivity (95% CI) | Specificity (95% CI) | Sensitivity (95% CI) | Specificity (95% CI) |
|---------------|----|----|-----|----|----------------------|----------------------|----------------------|----------------------|
| Ratzlaff 2015 | 16 | 0  | 127 | 0  | 0.11 [0.07, 0.18]    | Not estimable        |                      |                      |

## pain predominantly in FABER

| Study       | TP  | FP | FN | TN | Sensitivity (95% CI) | Specificity (95% CI) | Sensitivity (95% CI) | Specificity (95% CI) |
|-------------|-----|----|----|----|----------------------|----------------------|----------------------|----------------------|
| Nogier 2010 | 108 | 49 | 46 | 38 | 0.70 [0.62, 0.77]    | 0.44 [0.33, 0.55]    |                      |                      |

## log roll

| Study        | TP | FP | FN | TN | Sensitivity (95% CI) | Specificity (95% CI) | Sensitivity (95% CI) | Specificity (95% CI) |
|--------------|----|----|----|----|----------------------|----------------------|----------------------|----------------------|
| Clohisy 2009 | 12 | 0  | 28 | 0  | 0.30 [0.17, 0.47]    | Not estimable        |                      |                      |

## FPAW

| Study        | TP | FP | FN | TN | Sensitivity (95% CI) | Specificity (95% CI) | Sensitivity (95% CI) | Specificity (95% CI) |
|--------------|----|----|----|----|----------------------|----------------------|----------------------|----------------------|
| Ranawat 2017 | 68 | 39 | 43 | 49 | 0.61 [0.52, 0.70]    | 0.56 [0.45, 0.66]    |                      |                      |

## Maximal Squat Test

| Study      | TP | FP | FN | TN | Sensitivity (95% CI) | Specificity (95% CI) | Sensitivity (95% CI) | Specificity (95% CI) |
|------------|----|----|----|----|----------------------|----------------------|----------------------|----------------------|
| Ayeni 2014 | 24 | 27 | 8  | 19 | 0.75 [0.57, 0.89]    | 0.41 [0.27, 0.57]    |                      |                      |
