# Supplementary material for: Diagnostic accuracy of clinical tests for cam or pincer morphology in individuals with suspected FAI syndrome: a systematic review
Source: PubMed Central journal article supplement (PMC7213881; doi:10.1136/bmjsem-2020-000772), 2020-04-27
Supplement: bmjsem-2020-000772supp005.pdf [file bmjsem-2020-000772supp005.pdf]

## 2 GRADEpro evidence profile tables for all index tests

Judgement of the evidence quality with GRADEpro was made according to the following criteria:

Risk of bias:

not serious: if all risk of bias items were at low risk according to the QUADAS 2 tool

serious: if at least one item was at unclear risk and no high risk according to the QUADAS 2 tool

very serious: if at least one item was at high risk according to the QUADAS 2 tool

For detailed information of risk of bias rating, please check figure 3 (the QUADAS 2 tool).

Indirectness: Where positivity of the index or reference test or the execution of the index test were not clearly mentioned in the study, indirectness was rated as serious.

Inconsistency: If there was an unexplained heterogeneity of results across studies, inconsistency was rated as serious.

Based on the partially low prevalences in the included studies we decided a number of participants less than 250 as a serious imprecision.

**Question:** Should f120 add C be used to diagnose pincer or cam deformities in FAI syndrome?

|             |                             |
|-------------|-----------------------------|
| Sensitivity | 0.60 (95% CI: 0.52 to 0.68) |
| Specificity | -- (95% CI: -- to --)       |

|             |     |     |  |
|-------------|-----|-----|--|
| Prevalences | 55% | 85% |  |
|-------------|-----|-----|--|

| Outcome                                                                                             | № of studies<br>(№ of patients) | Study design                           | Factors that may decrease certainty of evidence |                      |               |                      |                  | Effect per 1.000 patients tested |                             | Test accuracy<br>CoE |   |
|-----------------------------------------------------------------------------------------------------|---------------------------------|----------------------------------------|-------------------------------------------------|----------------------|---------------|----------------------|------------------|----------------------------------|-----------------------------|----------------------|---|
|                                                                                                     |                                 |                                        | Risk of bias                                    | Indirectness         | Inconsistency | Imprecision          | Publication bias | pre-test probability of 55%      | pre-test probability of 85% |                      |   |
| <b>True positives</b><br>(patients with pincer or cam deformities)                                  | 1 studies<br>143 patients       | case-control<br>type accuracy<br>study | very serious<br><sup>a</sup>                    | serious <sup>b</sup> | not serious   | serious <sup>c</sup> | none             | 330 (286 to 374)                 | 510 (442 to 578)            | ⊕○○○<br>VERY LOW     |   |
| <b>False negatives</b><br>(patients incorrectly classified as not having pincer or cam deformities) |                                 |                                        |                                                 |                      |               |                      |                  | 220 (176 to 264)                 | 340 (272 to 408)            |                      |   |
| <b>True negatives</b><br>(patients without pincer or cam deformities)                               | 0 studies<br>0 patients         |                                        |                                                 |                      |               |                      |                  | 0 (0 to 0)                       | 0 (0 to 0)                  |                      | - |
| <b>False positives</b><br>(patients incorrectly classified as having pincer or cam deformities)     |                                 |                                        |                                                 |                      |               |                      |                  | 450 (450 to 450)                 | 150 (150 to 150)            |                      |   |

### Explanations

- Inclusion criteria do not exactly match the review question, execution and interpretation of index and reference test not described
- Test execution and interpretation not described
- small number of participants

**Question:** Should f120 add IR be used to diagnose pincer or cam deformities in FAI syndrome?

|             |                             |
|-------------|-----------------------------|
| Sensitivity | 0.74 (95% CI: 0.66 to 0.81) |
| Specificity | -- (95% CI: -- to --)       |

|             |     |     |  |
|-------------|-----|-----|--|
| Prevalences | 55% | 85% |  |
|-------------|-----|-----|--|

| Outcome                                                                                             | № of studies<br>(№ of patients) | Study design                                       | Factors that may decrease certainty of evidence |                      |               |                      |                  | Effect per 1.000 patients tested |                             | Test accuracy<br>CoE |   |
|-----------------------------------------------------------------------------------------------------|---------------------------------|----------------------------------------------------|-------------------------------------------------|----------------------|---------------|----------------------|------------------|----------------------------------|-----------------------------|----------------------|---|
|                                                                                                     |                                 |                                                    | Risk of bias                                    | Indirectness         | Inconsistency | Imprecision          | Publication bias | pre-test probability of 55%      | pre-test probability of 85% |                      |   |
| <b>True positives</b><br>(patients with pincer or cam deformities)                                  | 1 studies<br>143 patients       | case-control type<br>accuracy study                | very serious <sup>a</sup>                       | serious <sup>b</sup> | not serious   | serious <sup>c</sup> | none             | 407 (363 to 446)                 | 629 (561 to 689)            | ⊕○○○<br>VERY LOW     |   |
| <b>False negatives</b><br>(patients incorrectly classified as not having pincer or cam deformities) |                                 |                                                    |                                                 |                      |               |                      |                  | 143 (104 to 187)                 | 221 (161 to 289)            |                      |   |
| <b>True negatives</b><br>(patients without pincer or cam deformities)                               | 0 studies<br>0 patients         | cross-sectional<br>(cohort type<br>accuracy study) |                                                 |                      |               |                      |                  | 0 (0 to 0)                       | 0 (0 to 0)                  |                      | - |
| <b>False positives</b><br>(patients incorrectly classified as having pincer or cam deformities)     |                                 |                                                    |                                                 |                      |               |                      |                  | 450 (450 to 450)                 | 150 (150 to 150)            |                      |   |

### Explanations

- Inclusion criteria do not exactly match the review question, execution and interpretation of index and reference test not described
- Test execution and interpretation not described
- small number of participants

**Question:** Should f90 add C be used to diagnose pincer or cam deformities in FAI syndrome?

|             |                             |
|-------------|-----------------------------|
| Sensitivity | 0.33 (95% CI: 0.25 to 0.41) |
| Specificity | -- (95% CI: -- to --)       |

|             |     |     |  |
|-------------|-----|-----|--|
| Prevalences | 55% | 85% |  |
|-------------|-----|-----|--|

| Outcome                                                                                             | № of studies<br>(№ of patients) | Study design                                       | Factors that may decrease certainty of evidence |                      |               |                      |                  | Effect per 1.000 patients tested |                             | Test accuracy<br>CoE |   |
|-----------------------------------------------------------------------------------------------------|---------------------------------|----------------------------------------------------|-------------------------------------------------|----------------------|---------------|----------------------|------------------|----------------------------------|-----------------------------|----------------------|---|
|                                                                                                     |                                 |                                                    | Risk of bias                                    | Indirectness         | Inconsistency | Imprecision          | Publication bias | pre-test probability of 55%      | pre-test probability of 85% |                      |   |
| <b>True positives</b><br>(patients with pincer or cam deformities)                                  | 1 studies<br>143 patients       | case-control type<br>accuracy study                | very serious <sup>a</sup>                       | serious <sup>b</sup> | not serious   | serious <sup>c</sup> | none             | 182 (138 to 226)                 | 281 (213 to 349)            | ⊕○○○<br>VERY LOW     |   |
| <b>False negatives</b><br>(patients incorrectly classified as not having pincer or cam deformities) |                                 |                                                    |                                                 |                      |               |                      |                  | 368 (324 to 412)                 | 569 (501 to 637)            |                      |   |
| <b>True negatives</b><br>(patients without pincer or cam deformities)                               | 0 studies<br>0 patients         | cross-sectional<br>(cohort type<br>accuracy study) |                                                 |                      |               |                      |                  | 0 (0 to 0)                       | 0 (0 to 0)                  |                      | - |
| <b>False positives</b><br>(patients incorrectly classified as having pincer or cam deformities)     |                                 |                                                    |                                                 |                      |               |                      |                  | 450 (450 to 450)                 | 150 (150 to 150)            |                      |   |

### Explanations

- Inclusion criteria do not exactly match the review question, execution and interpretation of index and reference test not described
- Test execution and interpretation not described
- small number of participants

**Question:** Should FABER Distance test (FDT) be used to diagnose pincer or cam deformities in FAI syndrome?

|             |              |
|-------------|--------------|
| Sensitivity | 0.79 to 0.99 |
| Specificity | 0.33 to 0.42 |

|             |     |     |  |
|-------------|-----|-----|--|
| Prevalences | 55% | 85% |  |
|-------------|-----|-----|--|

| Outcome                                                                                             | № of studies<br>(№ of patients) | Study design                                 | Factors that may decrease certainty of evidence |              |               |             |                  | Effect per 1.000 patients tested |                             | Test accuracy<br>CoE |
|-----------------------------------------------------------------------------------------------------|---------------------------------|----------------------------------------------|-------------------------------------------------|--------------|---------------|-------------|------------------|----------------------------------|-----------------------------|----------------------|
|                                                                                                     |                                 |                                              | Risk of bias                                    | Indirectness | Inconsistency | Imprecision | Publication bias | pre-test probability of 55%      | pre-test probability of 85% |                      |
| <b>True positives</b><br>(patients with pincer or cam deformities)                                  | 2 studies<br>472 patients       | cohort & case-control type studies           | very serious <sup>a</sup>                       | not serious  | not serious   | not serious | none             | 435 to 545                       | 672 to 842                  | ⊕⊕○○<br>LOW          |
| <b>False negatives</b><br>(patients incorrectly classified as not having pincer or cam deformities) |                                 |                                              |                                                 |              |               |             |                  | 5 to 115                         | 8 to 178                    |                      |
| <b>True negatives</b><br>(patients without pincer or cam deformities)                               | 1 studies<br>432 patients       | cross-sectional (cohort type accuracy study) | serious <sup>a</sup>                            | not serious  | not serious   | not serious | none             | 149 to 189                       | 50 to 63                    | ⊕⊕⊕○<br>MODERATE     |
| <b>False positives</b><br>(patients incorrectly classified as having pincer or cam deformities)     |                                 |                                              |                                                 |              |               |             |                  | 261 to 301                       | 87 to 100                   |                      |

### Explanations

a. see QUADAS 2

**Question:** Should FABER test (Patrick) be used to diagnose pincer or cam deformities in FAI syndrome?

|             |              |
|-------------|--------------|
| Sensitivity | 0.15 to 1.00 |
| Specificity | 0.10 to 0.35 |

|             |     |     |  |
|-------------|-----|-----|--|
| Prevalences | 55% | 85% |  |
|-------------|-----|-----|--|

| Outcome                                                                                             | № of studies<br>(№ of patients) | Study design                                 | Factors that may decrease certainty of evidence |                      |                      |                      |                  | Effect per 1.000 patients tested |                             | Test accuracy<br>CoE |                  |
|-----------------------------------------------------------------------------------------------------|---------------------------------|----------------------------------------------|-------------------------------------------------|----------------------|----------------------|----------------------|------------------|----------------------------------|-----------------------------|----------------------|------------------|
|                                                                                                     |                                 |                                              | Risk of bias                                    | Indirectness         | Inconsistency        | Imprecision          | Publication bias | pre-test probability of 55%      | pre-test probability of 85% |                      |                  |
| <b>True positives</b><br>(patients with pincer or cam deformities)                                  | 3 studies<br>201 patients       | cohort & case-control type studies           | very serious <sup>a</sup>                       | serious <sup>b</sup> | serious <sup>c</sup> | serious <sup>d</sup> | none             | 83 to 550                        | 128 to 850                  | ⊕○○○<br>VERY LOW     |                  |
| <b>False negatives</b><br>(patients incorrectly classified as not having pincer or cam deformities) |                                 |                                              |                                                 |                      |                      |                      |                  | 0 to 467                         | 0 to 722                    |                      |                  |
| <b>True negatives</b><br>(patients without pincer or cam deformities)                               | 1 studies<br>45 patients        | cross-sectional (cohort type accuracy study) | very serious <sup>a</sup>                       | not serious          | not serious          | serious <sup>d</sup> | none             | 45 to 157                        | 15 to 53                    |                      | ⊕○○○<br>VERY LOW |
| <b>False positives</b><br>(patients incorrectly classified as having pincer or cam deformities)     |                                 |                                              |                                                 |                      |                      |                      |                  | 293 to 405                       | 97 to 135                   |                      |                  |

### Explanations

- a. see QUADAS 2
- b. reference test positivity not always stated
- c. wide variance of point estimates across studies
- d. small number of participants

**Question:** Should FADIR test (AIT, f90 add IR) be used to diagnose pincer or cam deformities in FAI syndrome?

|             |              |
|-------------|--------------|
| Sensitivity | 0.47 to 1.00 |
| Specificity | 0.06 to 0.20 |

|             |     |     |  |
|-------------|-----|-----|--|
| Prevalences | 55% | 85% |  |
|-------------|-----|-----|--|

| Outcome                                                                                             | № of studies<br>(№ of patients) | Study design                                 | Factors that may decrease certainty of evidence |              |                      |                      |                  | Effect per 1.000 patients tested |                             | Test accuracy<br>CoE |
|-----------------------------------------------------------------------------------------------------|---------------------------------|----------------------------------------------|-------------------------------------------------|--------------|----------------------|----------------------|------------------|----------------------------------|-----------------------------|----------------------|
|                                                                                                     |                                 |                                              | Risk of bias                                    | Indirectness | Inconsistency        | Imprecision          | Publication bias | pre-test probability of 55%      | pre-test probability of 85% |                      |
| <b>True positives</b><br>(patients with pincer or cam deformities)                                  | 4 studies<br>608 patients       | cohort & case-control type studies           | very serious <sup>a</sup>                       | not serious  | serious <sup>b</sup> | not serious          | none             | 259 to 550                       | 399 to 850                  | ⊕○○○<br>VERY LOW     |
| <b>False negatives</b><br>(patients incorrectly classified as not having pincer or cam deformities) |                                 |                                              |                                                 |              |                      |                      |                  | 0 to 291                         | 0 to 451                    |                      |
| <b>True negatives</b><br>(patients without pincer or cam deformities)                               | 1 studies<br>88 patients        | cross-sectional (cohort type accuracy study) | serious <sup>a</sup>                            | not serious  | not serious          | serious <sup>c</sup> | none             | 27 to 90                         | 9 to 30                     | ⊕⊕○○<br>LOW          |
| <b>False positives</b><br>(patients incorrectly classified as having pincer or cam deformities)     |                                 |                                              |                                                 |              |                      |                      |                  | 360 to 423                       | 120 to 141                  |                      |

### Explanations

- a. see QUADAS 2
- b. wide variance of point estimates across studies
- c. small number of participants

**Question:** Should FLEX ROM < 115 be used to diagnose pincer or cam deformities in FAI syndrome?

|             |                             |
|-------------|-----------------------------|
| Sensitivity | 0.20 (95% CI: 0.14 to 0.28) |
| Specificity | -- (95% CI: -- to --)       |

|             |     |     |  |
|-------------|-----|-----|--|
| Prevalences | 55% | 85% |  |
|-------------|-----|-----|--|

| Outcome                                                                                             | № of studies<br>(№ of patients) | Study design                           | Factors that may decrease certainty of evidence |                      |               |                      |                  | Effect per 1.000 patients tested |                             | Test accuracy<br>CoE |   |
|-----------------------------------------------------------------------------------------------------|---------------------------------|----------------------------------------|-------------------------------------------------|----------------------|---------------|----------------------|------------------|----------------------------------|-----------------------------|----------------------|---|
|                                                                                                     |                                 |                                        | Risk of bias                                    | Indirectness         | Inconsistency | Imprecision          | Publication bias | pre-test probability of 55%      | pre-test probability of 85% |                      |   |
| <b>True positives</b><br>(patients with pincer or cam deformities)                                  | 1 studies<br>143 patients       | case-control<br>type accuracy<br>study | very serious <sup>a</sup>                       | serious <sup>b</sup> | not serious   | serious <sup>c</sup> | none             | 110 (77 to 154)                  | 170 (119 to 238)            | ⊕○○○<br>VERY LOW     |   |
| <b>False negatives</b><br>(patients incorrectly classified as not having pincer or cam deformities) |                                 |                                        |                                                 |                      |               |                      |                  | 440 (396 to 473)                 | 680 (612 to 731)            |                      |   |
| <b>True negatives</b><br>(patients without pincer or cam deformities)                               | 0 studies<br>0 patients         |                                        |                                                 |                      |               |                      |                  | 0 (0 to 0)                       | 0 (0 to 0)                  |                      | - |
| <b>False positives</b><br>(patients incorrectly classified as having pincer or cam deformities)     |                                 |                                        |                                                 |                      |               |                      |                  | 450 (450 to 450)                 | 150 (150 to 150)            |                      |   |

### Explanations

- Inclusion criteria do not exactly match the review question, execution and interpretation of index and reference test not described
- Test execution and interpretation not described
- small number of participants



**Question:** Should FPAW be used to diagnose pincer or cam deformities in FAI syndrome?

|             |                             |
|-------------|-----------------------------|
| Sensitivity | 0.61 (95% CI: 0.52 to 0.70) |
| Specificity | 0.56 (95% CI: 0.45 to 0.66) |

|             |     |     |  |
|-------------|-----|-----|--|
| Prevalences | 55% | 85% |  |
|-------------|-----|-----|--|

| Outcome                                                                                             | № of studies<br>(№ of patients) | Study design                                    | Factors that may decrease certainty of evidence |              |               |                      |                  | Effect per 1.000 patients tested |                             | Test accuracy<br>CoE |                  |
|-----------------------------------------------------------------------------------------------------|---------------------------------|-------------------------------------------------|-------------------------------------------------|--------------|---------------|----------------------|------------------|----------------------------------|-----------------------------|----------------------|------------------|
|                                                                                                     |                                 |                                                 | Risk of bias                                    | Indirectness | Inconsistency | Imprecision          | Publication bias | pre-test probability of 55%      | pre-test probability of 85% |                      |                  |
| <b>True positives</b><br>(patients with pincer or cam deformities)                                  | 1 studies<br>111 patients       | cross-sectional<br>(cohort type accuracy study) | not serious                                     | not serious  | not serious   | serious <sup>a</sup> | none             | 336 (286 to 385)                 | 519 (442 to 595)            | ⊕⊕⊕○<br>MODERATE     |                  |
| <b>False negatives</b><br>(patients incorrectly classified as not having pincer or cam deformities) |                                 |                                                 |                                                 |              |               |                      |                  | 214 (165 to 264)                 | 331 (255 to 408)            |                      |                  |
| <b>True negatives</b><br>(patients without pincer or cam deformities)                               | 1 studies<br>88 patients        | cross-sectional<br>(cohort type accuracy study) | not serious                                     | not serious  | not serious   | serious <sup>a</sup> | none             | 252 (202 to 297)                 | 84 (68 to 99)               |                      | ⊕⊕⊕○<br>MODERATE |
| <b>False positives</b><br>(patients incorrectly classified as having pincer or cam deformities)     |                                 |                                                 |                                                 |              |               |                      |                  | 198 (153 to 248)                 | 66 (51 to 82)               |                      |                  |

### Explanations

a. small number of participants

**Question:** Should Internal Rotation Pain test be used to diagnose pincer or cam deformities in FAI syndrome?

|             |                             |
|-------------|-----------------------------|
| Sensitivity | 0.39 (95% CI: 0.31 to 0.48) |
| Specificity | -- (95% CI: -- to --)       |

|             |     |     |  |
|-------------|-----|-----|--|
| Prevalences | 55% | 85% |  |
|-------------|-----|-----|--|

| Outcome                                                                                             | № of studies<br>(№ of patients) | Study design                                       | Factors that may decrease certainty of evidence |                      |               |                      |                  | Effect per 1.000 patients tested |                             | Test accuracy<br>CoE |   |
|-----------------------------------------------------------------------------------------------------|---------------------------------|----------------------------------------------------|-------------------------------------------------|----------------------|---------------|----------------------|------------------|----------------------------------|-----------------------------|----------------------|---|
|                                                                                                     |                                 |                                                    | Risk of bias                                    | Indirectness         | Inconsistency | Imprecision          | Publication bias | pre-test probability of 55%      | pre-test probability of 85% |                      |   |
| <b>True positives</b><br>(patients with pincer or cam deformities)                                  | 1 studies<br>143 patients       | case-control type<br>accuracy study                | very serious <sup>a</sup>                       | serious <sup>b</sup> | not serious   | serious <sup>c</sup> | none             | 215 (171 to 264)                 | 332 (264 to 408)            | ⊕○○○<br>VERY LOW     |   |
| <b>False negatives</b><br>(patients incorrectly classified as not having pincer or cam deformities) |                                 |                                                    |                                                 |                      |               |                      |                  | 335 (286 to 379)                 | 518 (442 to 586)            |                      |   |
| <b>True negatives</b><br>(patients without pincer or cam deformities)                               | 0 studies<br>0 patients         | cross-sectional<br>(cohort type<br>accuracy study) |                                                 |                      |               |                      |                  | 0 (0 to 0)                       | 0 (0 to 0)                  |                      | - |
| <b>False positives</b><br>(patients incorrectly classified as having pincer or cam deformities)     |                                 |                                                    |                                                 |                      |               |                      |                  | 450 (450 to 450)                 | 150 (150 to 150)            |                      |   |

### Explanations

- inclusioncriteria do not exactly match the review question, execution and interpretation of index and reference test not described
- Test execution and interpretation not described
- small number of participants

**Question:** Should IR ROM & f90 IR be used to diagnose pincer or cam deformities in FAI syndrome?

|             |                             |
|-------------|-----------------------------|
| Sensitivity | 0.11 (95% CI: 0.07 to 0.18) |
| Specificity | -- (95% CI: -- to --)       |

|             |     |     |  |
|-------------|-----|-----|--|
| Prevalences | 55% | 85% |  |
|-------------|-----|-----|--|

| Outcome                                                                                             | № of studies<br>(№ of patients) | Study design                           | Factors that may decrease certainty of evidence |                      |               |                      |                  | Effect per 1.000 patients tested |                             | Test accuracy<br>CoE |   |
|-----------------------------------------------------------------------------------------------------|---------------------------------|----------------------------------------|-------------------------------------------------|----------------------|---------------|----------------------|------------------|----------------------------------|-----------------------------|----------------------|---|
|                                                                                                     |                                 |                                        | Risk of bias                                    | Indirectness         | Inconsistency | Imprecision          | Publication bias | pre-test probability of 55%      | pre-test probability of 85% |                      |   |
| <b>True positives</b><br>(patients with pincer or cam deformities)                                  | 1 studies<br>143 patients       | case-control<br>type accuracy<br>study | very serious<br><sup>a</sup>                    | serious <sup>b</sup> | not serious   | serious <sup>c</sup> | none             | 61 (39 to 99)                    | 94 (60 to 153)              | ⊕○○○<br>VERY LOW     |   |
| <b>False negatives</b><br>(patients incorrectly classified as not having pincer or cam deformities) |                                 |                                        |                                                 |                      |               |                      |                  | 489 (451 to 511)                 | 756 (697 to 790)            |                      |   |
| <b>True negatives</b><br>(patients without pincer or cam deformities)                               | 0 studies<br>0 patients         |                                        |                                                 |                      |               |                      |                  | 0 (0 to 0)                       | 0 (0 to 0)                  |                      | - |
| <b>False positives</b><br>(patients incorrectly classified as having pincer or cam deformities)     |                                 |                                        |                                                 |                      |               |                      |                  | 450 (450 to 450)                 | 150 (150 to 150)            |                      |   |

### Explanations

- Inclusion criteria do not exactly match the review question, execution and interpretation of index and reference test not described
- Test execution and interpretation not described
- small number of participants

**Question:** Should IR ROM & FABER be used to diagnose pincer or cam deformities in FAI syndrome?

|             |                             |
|-------------|-----------------------------|
| Sensitivity | 0.13 (95% CI: 0.08 to 0.20) |
| Specificity | -- (95% CI: -- to --)       |

|             |     |     |  |
|-------------|-----|-----|--|
| Prevalences | 55% | 85% |  |
|-------------|-----|-----|--|

| Outcome                                                                                             | № of studies<br>(№ of patients) | Study design                           | Factors that may decrease certainty of evidence |                      |               |                      |                  | Effect per 1.000 patients tested |                             | Test accuracy<br>CoE |   |
|-----------------------------------------------------------------------------------------------------|---------------------------------|----------------------------------------|-------------------------------------------------|----------------------|---------------|----------------------|------------------|----------------------------------|-----------------------------|----------------------|---|
|                                                                                                     |                                 |                                        | Risk of bias                                    | Indirectness         | Inconsistency | Imprecision          | Publication bias | pre-test probability of 55%      | pre-test probability of 85% |                      |   |
| <b>True positives</b><br>(patients with pincer or cam deformities)                                  | 1 studies<br>143 patients       | case-control<br>type accuracy<br>study | very serious<br><sup>a</sup>                    | serious <sup>b</sup> | not serious   | serious <sup>c</sup> | none             | 72 (44 to 110)                   | 111 (68 to 170)             | ⊕○○○<br>VERY LOW     |   |
| <b>False negatives</b><br>(patients incorrectly classified as not having pincer or cam deformities) |                                 |                                        |                                                 |                      |               |                      |                  | 478 (440 to 506)                 | 739 (680 to 782)            |                      |   |
| <b>True negatives</b><br>(patients without pincer or cam deformities)                               | 0 studies<br>0 patients         |                                        |                                                 |                      |               |                      |                  | 0 (0 to 0)                       | 0 (0 to 0)                  |                      | - |
| <b>False positives</b><br>(patients incorrectly classified as having pincer or cam deformities)     |                                 |                                        |                                                 |                      |               |                      |                  | 450 (450 to 450)                 | 150 (150 to 150)            |                      |   |

### Explanations

- Inclusion criteria do not exactly match the review question, execution and interpretation of index and reference test not described
- Test execution and interpretation not described
- small number of participants

**Question:** Should IR ROM < 120 be used to diagnose pincer or cam deformities in FAI syndrome?

|             |                             |
|-------------|-----------------------------|
| Sensitivity | 0.22 (95% CI: 0.15 to 0.29) |
| Specificity | -- (95% CI: -- to --)       |

|             |     |     |  |
|-------------|-----|-----|--|
| Prevalences | 55% | 85% |  |
|-------------|-----|-----|--|

| Outcome                                                                                             | № of studies<br>(№ of patients) | Study design                           | Factors that may decrease certainty of evidence |                      |               |                      |                  | Effect per 1.000 patients tested |                             | Test accuracy<br>CoE |   |
|-----------------------------------------------------------------------------------------------------|---------------------------------|----------------------------------------|-------------------------------------------------|----------------------|---------------|----------------------|------------------|----------------------------------|-----------------------------|----------------------|---|
|                                                                                                     |                                 |                                        | Risk of bias                                    | Indirectness         | Inconsistency | Imprecision          | Publication bias | pre-test probability of 55%      | pre-test probability of 85% |                      |   |
| <b>True positives</b><br>(patients with pincer or cam deformities)                                  | 1 studies<br>143 patients       | case-control<br>type accuracy<br>study | very serious<br><sup>a</sup>                    | serious <sup>b</sup> | not serious   | serious <sup>c</sup> | none             | 121 (83 to 160)                  | 187 (128 to 246)            | ⊕○○○<br>VERY LOW     |   |
| <b>False negatives</b><br>(patients incorrectly classified as not having pincer or cam deformities) |                                 |                                        |                                                 |                      |               |                      |                  | 429 (390 to 467)                 | 663 (604 to 722)            |                      |   |
| <b>True negatives</b><br>(patients without pincer or cam deformities)                               | 0 studies<br>0 patients         |                                        |                                                 |                      |               |                      |                  | 0 (0 to 0)                       | 0 (0 to 0)                  |                      | - |
| <b>False positives</b><br>(patients incorrectly classified as having pincer or cam deformities)     |                                 |                                        |                                                 |                      |               |                      |                  | 450 (450 to 450)                 | 150 (150 to 150)            |                      |   |

### Explanations

- Inclusion criteria do not exactly match the review question, execution and interpretation of index and reference test not described
- Test execution and interpretation not described
- small number of participants

**Question:** Should IROP be used to diagnose pincer or cam deformities in FAI syndrome?

|             |                             |
|-------------|-----------------------------|
| Sensitivity | 1.00 (95% CI: 0.48 to 1.00) |
| Specificity | 0.16 (95% CI: 0.06 to 0.29) |

|             |     |     |  |
|-------------|-----|-----|--|
| Prevalences | 55% | 85% |  |
|-------------|-----|-----|--|

| Outcome                                                                                             | № of studies<br>(№ of patients) | Study design                                    | Factors that may decrease certainty of evidence |                      |               |                      |                  | Effect per 1.000 patients tested |                             | Test accuracy<br>CoE |                  |
|-----------------------------------------------------------------------------------------------------|---------------------------------|-------------------------------------------------|-------------------------------------------------|----------------------|---------------|----------------------|------------------|----------------------------------|-----------------------------|----------------------|------------------|
|                                                                                                     |                                 |                                                 | Risk of bias                                    | Indirectness         | Inconsistency | Imprecision          | Publication bias | pre-test probability of 55%      | pre-test probability of 85% |                      |                  |
| <b>True positives</b><br>(patients with pincer or cam deformities)                                  | 1 studies<br>5 patients         | cross-sectional<br>(cohort type accuracy study) | very serious <sup>a</sup>                       | serious <sup>b</sup> | not serious   | serious <sup>c</sup> | none             | 550 (264 to 550)                 | 850 (408 to 850)            | ⊕○○○<br>VERY LOW     |                  |
| <b>False negatives</b><br>(patients incorrectly classified as not having pincer or cam deformities) |                                 |                                                 |                                                 |                      |               |                      |                  | 0 (0 to 286)                     | 0 (0 to 442)                |                      |                  |
| <b>True negatives</b><br>(patients without pincer or cam deformities)                               | 1 studies<br>45 patients        | cross-sectional<br>(cohort type accuracy study) | very serious <sup>a</sup>                       | serious <sup>b</sup> | not serious   | serious <sup>c</sup> | none             | 72 (27 to 130)                   | 24 (9 to 44)                |                      | ⊕○○○<br>VERY LOW |
| <b>False positives</b><br>(patients incorrectly classified as having pincer or cam deformities)     |                                 |                                                 |                                                 |                      |               |                      |                  | 378 (320 to 423)                 | 126 (106 to 141)            |                      |                  |

### Explanations

- no blinding of assessor, positivity criteria for reference test not declared
- positivity criteria for reference test not declared
- very small number of participants

**Question:** Should log roll test be used to diagnose pincer or cam deformities in FAI syndrome?

|             |                             |
|-------------|-----------------------------|
| Sensitivity | 0.30 (95% CI: 0.17 to 0.43) |
| Specificity | -- (95% CI: -- to --)       |

|             |     |     |  |
|-------------|-----|-----|--|
| Prevalences | 55% | 85% |  |
|-------------|-----|-----|--|

| Outcome                                                                                             | № of studies<br>(№ of patients) | Study design                           | Factors that may decrease certainty of evidence |                           |               |                      |                  | Effect per 1.000 patients tested |                             | Test accuracy<br>CoE |   |
|-----------------------------------------------------------------------------------------------------|---------------------------------|----------------------------------------|-------------------------------------------------|---------------------------|---------------|----------------------|------------------|----------------------------------|-----------------------------|----------------------|---|
|                                                                                                     |                                 |                                        | Risk of bias                                    | Indirectness              | Inconsistency | Imprecision          | Publication bias | pre-test probability of 55%      | pre-test probability of 85% |                      |   |
| <b>True positives</b><br>(patients with pincer or cam deformities)                                  | 1 studies<br>40 patients        | case-control<br>type accuracy<br>study | very serious <sup>a</sup>                       | very serious <sup>b</sup> | not serious   | serious <sup>c</sup> | none             | 165 (94 to 237)                  | 255 (145 to 366)            | ⊕○○○<br>VERY LOW     |   |
| <b>False negatives</b><br>(patients incorrectly classified as not having pincer or cam deformities) |                                 |                                        |                                                 |                           |               |                      |                  | 385 (313 to 456)                 | 595 (484 to 705)            |                      |   |
| <b>True negatives</b><br>(patients without pincer or cam deformities)                               | 0 studies<br>0 patients         |                                        |                                                 |                           |               |                      |                  | 0 (0 to 0)                       | 0 (0 to 0)                  |                      | - |
| <b>False positives</b><br>(patients incorrectly classified as having pincer or cam deformities)     |                                 |                                        |                                                 |                           |               |                      |                  | 450 (450 to 450)                 | 150 (150 to 150)            |                      |   |

### Explanations

- a. only cases, assessor not blinded, execution of index test not described, exclusion criteria not appropriate  
 b. execution of index test not described, exclusion criteria not appropriate  
 c. small number of participants

**Question:** Should maximal Squat test be used to diagnose cam deformity in FAI syndrome?

|             |                             |
|-------------|-----------------------------|
| Sensitivity | 0.75 (95% CI: 0.57 to 0.89) |
| Specificity | 0.41 (95% CI: 0.27 to 0.57) |

|             |     |     |  |
|-------------|-----|-----|--|
| Prevalences | 55% | 85% |  |
|-------------|-----|-----|--|

| Outcome                                                                                 | № of studies<br>(№ of patients) | Study design                                    | Factors that may decrease certainty of evidence |              |               |                      |                  | Effect per 1.000 patients tested |                             | Test accuracy<br>CoE |                  |
|-----------------------------------------------------------------------------------------|---------------------------------|-------------------------------------------------|-------------------------------------------------|--------------|---------------|----------------------|------------------|----------------------------------|-----------------------------|----------------------|------------------|
|                                                                                         |                                 |                                                 | Risk of bias                                    | Indirectness | Inconsistency | Imprecision          | Publication bias | pre-test probability of 55%      | pre-test probability of 85% |                      |                  |
| <b>True positives</b><br>(patients with cam deformity)                                  | 1 studies<br>32 patients        | cross-sectional<br>(cohort type accuracy study) | not serious                                     | not serious  | not serious   | serious <sup>a</sup> | none             | 413 (314 to 490)                 | 638 (484 to 757)            | ⊕⊕⊕○<br>MODERATE     |                  |
| <b>False negatives</b><br>(patients incorrectly classified as not having cam deformity) |                                 |                                                 |                                                 |              |               |                      |                  | 137 (60 to 236)                  | 212 (93 to 366)             |                      |                  |
| <b>True negatives</b><br>(patients without cam deformity)                               | 1 studies<br>46 patients        | cross-sectional<br>(cohort type accuracy study) | not serious                                     | not serious  | not serious   | serious <sup>a</sup> | none             | 184 (122 to 256)                 | 62 (41 to 86)               |                      | ⊕⊕⊕○<br>MODERATE |
| <b>False positives</b><br>(patients incorrectly classified as having cam deformity)     |                                 |                                                 |                                                 |              |               |                      |                  | 266 (194 to 328)                 | 88 (64 to 109)              |                      |                  |

### Explanations

a. small number of participants



**Question:** Should pain predominantly in F/IR be used to diagnose pincer or cam deformities in FAI syndrome?

|             |                             |
|-------------|-----------------------------|
| Sensitivity | 0.70 (95% CI: 0.62 to 0.77) |
| Specificity | 0.44 (95% CI: 0.33 to 0.55) |

|             |     |     |  |
|-------------|-----|-----|--|
| Prevalences | 55% | 85% |  |
|-------------|-----|-----|--|

| Outcome                                                                                             | № of studies<br>(№ of patients) | Study design                                    | Factors that may decrease certainty of evidence |              |               |                      |                  | Effect per 1.000 patients tested |                             | Test accuracy<br>CoE |             |
|-----------------------------------------------------------------------------------------------------|---------------------------------|-------------------------------------------------|-------------------------------------------------|--------------|---------------|----------------------|------------------|----------------------------------|-----------------------------|----------------------|-------------|
|                                                                                                     |                                 |                                                 | Risk of bias                                    | Indirectness | Inconsistency | Imprecision          | Publication bias | pre-test probability of 55%      | pre-test probability of 85% |                      |             |
| <b>True positives</b><br>(patients with pincer or cam deformities)                                  | 1 studies<br>154 patients       | cross-sectional<br>(cohort type accuracy study) | serious <sup>a</sup>                            | not serious  | not serious   | serious <sup>b</sup> | none             | 385 (341 to 424)                 | 595 (527 to 655)            | ⊕⊕○○<br>LOW          |             |
| <b>False negatives</b><br>(patients incorrectly classified as not having pincer or cam deformities) |                                 |                                                 |                                                 |              |               |                      |                  | 165 (126 to 209)                 | 255 (195 to 323)            |                      |             |
| <b>True negatives</b><br>(patients without pincer or cam deformities)                               | 1 studies<br>87 patients        | cross-sectional<br>(cohort type accuracy study) | serious <sup>a</sup>                            | not serious  | not serious   | serious <sup>b</sup> | none             | 198 (149 to 248)                 | 66 (50 to 83)               |                      | ⊕⊕○○<br>LOW |
| <b>False positives</b><br>(patients incorrectly classified as having pincer or cam deformities)     |                                 |                                                 |                                                 |              |               |                      |                  | 252 (202 to 301)                 | 84 (67 to 100)              |                      |             |

### Explanations

- a. see QUADAS 2  
b. small number of participants

**Question:** Should PIT be used to diagnose pincer or cam deformities in FAI syndrome?

|             |              |
|-------------|--------------|
| Sensitivity | 0.11 to 0.36 |
| Specificity | -- to --     |

|             |     |     |  |
|-------------|-----|-----|--|
| Prevalences | 55% | 85% |  |
|-------------|-----|-----|--|

| Outcome                                                                                             | № of studies<br>(№ of patients) | Study design                                 | Factors that may decrease certainty of evidence |                      |               |                      |                  | Effect per 1.000 patients tested |                             | Test accuracy<br>CoE |   |
|-----------------------------------------------------------------------------------------------------|---------------------------------|----------------------------------------------|-------------------------------------------------|----------------------|---------------|----------------------|------------------|----------------------------------|-----------------------------|----------------------|---|
|                                                                                                     |                                 |                                              | Risk of bias                                    | Indirectness         | Inconsistency | Imprecision          | Publication bias | pre-test probability of 55%      | pre-test probability of 85% |                      |   |
| <b>True positives</b><br>(patients with pincer or cam deformities)                                  | 2 studies<br>190 patients       | case-control type accuracy study             | very serious <sup>a</sup>                       | serious <sup>b</sup> | not serious   | serious <sup>c</sup> | none             | 61 to 198                        | 94 to 306                   | ⊕○○○<br>VERY LOW     |   |
| <b>False negatives</b><br>(patients incorrectly classified as not having pincer or cam deformities) |                                 |                                              |                                                 |                      |               |                      |                  | 352 to 489                       | 544 to 756                  |                      |   |
| <b>True negatives</b><br>(patients without pincer or cam deformities)                               | 0 studies<br>0 patients         | cross-sectional (cohort type accuracy study) |                                                 |                      |               |                      |                  | 0 to 0                           | 0 to 0                      |                      | - |
| <b>False positives</b><br>(patients incorrectly classified as having pincer or cam deformities)     |                                 |                                              |                                                 |                      |               |                      |                  | 450 to 450                       | 150 to 150                  |                      |   |

### Explanations

- a. see QUADAS 2, only cases included in one study, examiner was not blinded  
 b. criteria for index test positivity not stated  
 c. small number of participants

**Question:** Should Scour maneuver be used to diagnose pincer or cam deformities in FAI syndrome?

|             |                             |
|-------------|-----------------------------|
| Sensitivity | 0.80 (95% CI: 0.28 to 0.99) |
| Specificity | 0.40 (95% CI: 0.26 to 0.56) |

|             |     |     |  |
|-------------|-----|-----|--|
| Prevalences | 55% | 85% |  |
|-------------|-----|-----|--|

| Outcome                                                                                             | № of studies<br>(№ of patients) | Study design                                    | Factors that may decrease certainty of evidence |                      |               |                      |                  | Effect per 1.000 patients tested |                             | Test accuracy<br>CoE |                  |
|-----------------------------------------------------------------------------------------------------|---------------------------------|-------------------------------------------------|-------------------------------------------------|----------------------|---------------|----------------------|------------------|----------------------------------|-----------------------------|----------------------|------------------|
|                                                                                                     |                                 |                                                 | Risk of bias                                    | Indirectness         | Inconsistency | Imprecision          | Publication bias | pre-test probability of 55%      | pre-test probability of 85% |                      |                  |
| <b>True positives</b><br>(patients with pincer or cam deformities)                                  | 1 studies<br>5 patients         | cross-sectional<br>(cohort type accuracy study) | very serious <sup>a</sup>                       | serious <sup>b</sup> | not serious   | serious <sup>c</sup> | none             | 440 (154 to 545)                 | 680 (238 to 842)            | ⊕○○○<br>VERY LOW     |                  |
| <b>False negatives</b><br>(patients incorrectly classified as not having pincer or cam deformities) |                                 |                                                 |                                                 |                      |               |                      |                  | 110 (5 to 396)                   | 170 (8 to 612)              |                      |                  |
| <b>True negatives</b><br>(patients without pincer or cam deformities)                               | 1 studies<br>45 patients        | cross-sectional<br>(cohort type accuracy study) | very serious <sup>a</sup>                       | serious <sup>b</sup> | not serious   | serious <sup>d</sup> | none             | 180 (117 to 252)                 | 60 (39 to 84)               |                      | ⊕○○○<br>VERY LOW |
| <b>False positives</b><br>(patients incorrectly classified as having pincer or cam deformities)     |                                 |                                                 |                                                 |                      |               |                      |                  | 270 (198 to 333)                 | 90 (66 to 111)              |                      |                  |

### Explanations

- a. no blinding of assessor, positivity criteria for reference test not declared
- b. positivity criteria for reference test not declared
- c. very small number of participants
- d. few patients, CI < 0.5

**Question:** Should Stinchfield test (RSLR) be used to diagnose pincer or cam deformities in FAI syndrome?

|             |              |
|-------------|--------------|
| Sensitivity | 0.15 to 0.95 |
| Specificity | 0.22 to 0.51 |

|             |     |     |  |
|-------------|-----|-----|--|
| Prevalences | 55% | 85% |  |
|-------------|-----|-----|--|

| Outcome                                                                                             | № of studies<br>(№ of patients) | Study design                                 | Factors that may decrease certainty of evidence |                      |               |                      |                  | Effect per 1.000 patients tested |                             | Test accuracy<br>CoE |                  |
|-----------------------------------------------------------------------------------------------------|---------------------------------|----------------------------------------------|-------------------------------------------------|----------------------|---------------|----------------------|------------------|----------------------------------|-----------------------------|----------------------|------------------|
|                                                                                                     |                                 |                                              | Risk of bias                                    | Indirectness         | Inconsistency | Imprecision          | Publication bias | pre-test probability of 55%      | pre-test probability of 85% |                      |                  |
| <b>True positives</b><br>(patients with pincer or cam deformities)                                  | 2 studies<br>46 patients        | cohort & case-control type studies           | very serious <sup>a</sup>                       | serious <sup>b</sup> | not serious   | serious <sup>c</sup> | none             | 83 to 523                        | 128 to 808                  | ⊕○○○<br>VERY LOW     |                  |
| <b>False negatives</b><br>(patients incorrectly classified as not having pincer or cam deformities) |                                 |                                              |                                                 |                      |               |                      |                  | 27 to 467                        | 42 to 722                   |                      |                  |
| <b>True negatives</b><br>(patients without pincer or cam deformities)                               | 1 studies<br>45 patients        | cross-sectional (cohort type accuracy study) | serious <sup>d</sup>                            | serious <sup>e</sup> | not serious   | serious <sup>c</sup> | none             | 99 to 229                        | 33 to 77                    |                      | ⊕○○○<br>VERY LOW |
| <b>False positives</b><br>(patients incorrectly classified as having pincer or cam deformities)     |                                 |                                              |                                                 |                      |               |                      |                  | 221 to 351                       | 73 to 117                   |                      |                  |

### Explanations

- a. see QUADAS 2, no blinding of assessor, only cases included in one study
- b. positivity of reference test not declared in one study
- c. very small number of participants
- d. see QUADAS 2, no blinding of assessor, positivity of reference test not declared
- e. positivity of reference test not declared
